# Supplementary material for: CBX2 shapes chromatin accessibility promoting AML via p38 MAPK signaling pathway
Source: PubMed Central journal article supplement (PMC9178829; doi:10.1186/s12943-022-01603-y), 2022-06-09

# Supplementary figure 1

A

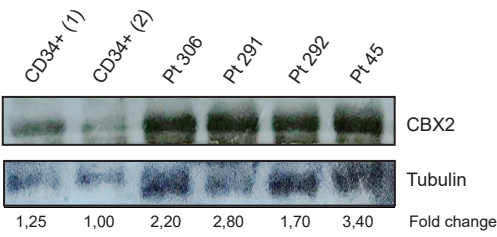

B

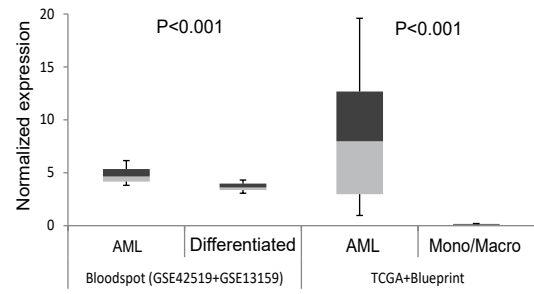

C

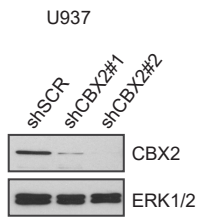

D

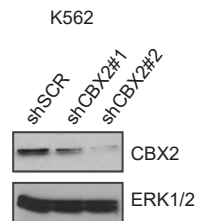

E

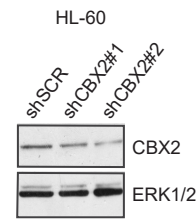

F

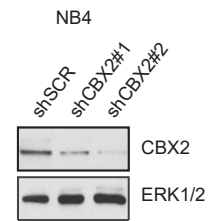

G

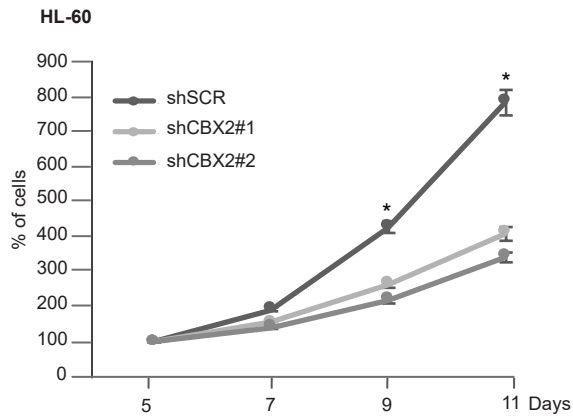

H

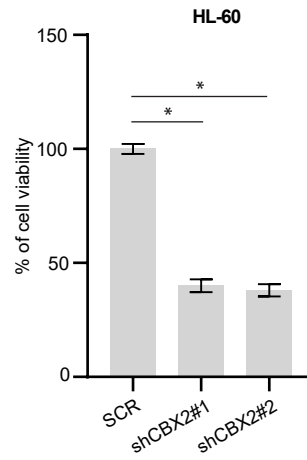

I

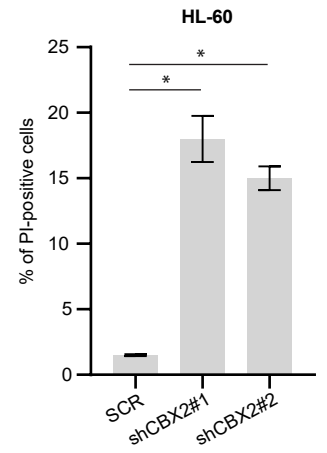

L

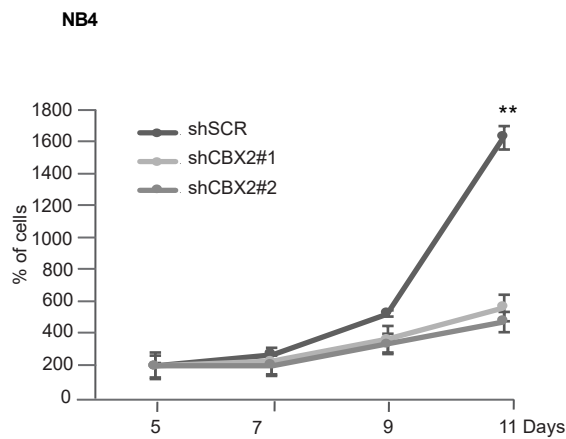

M

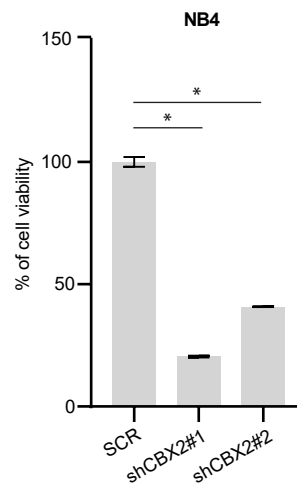

N

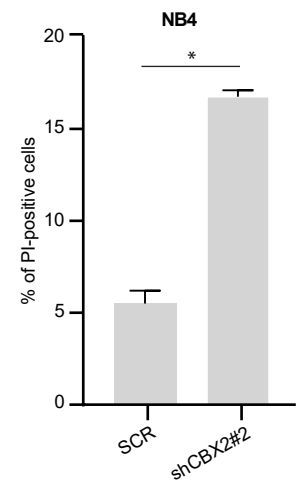

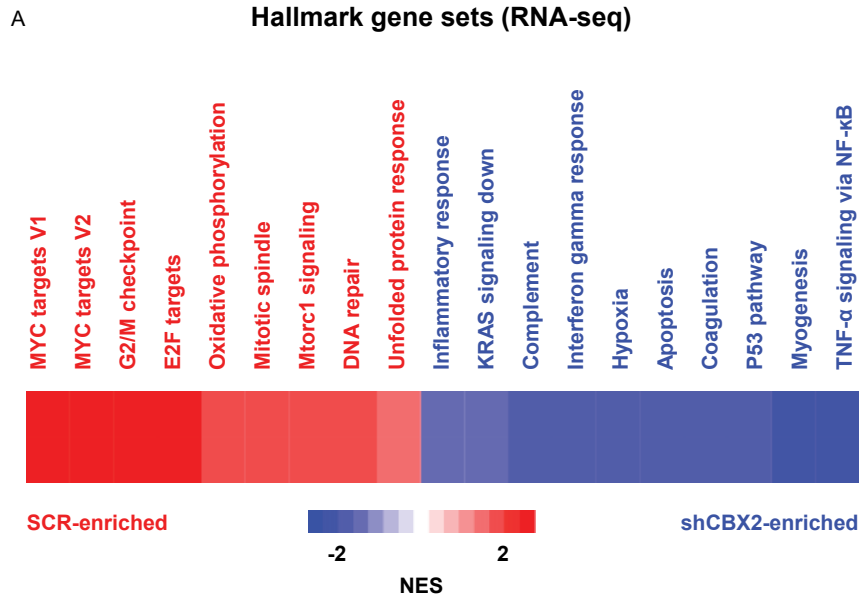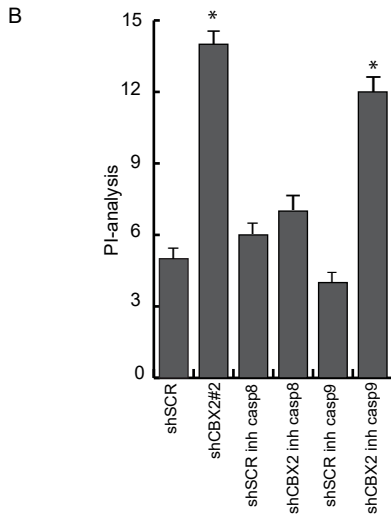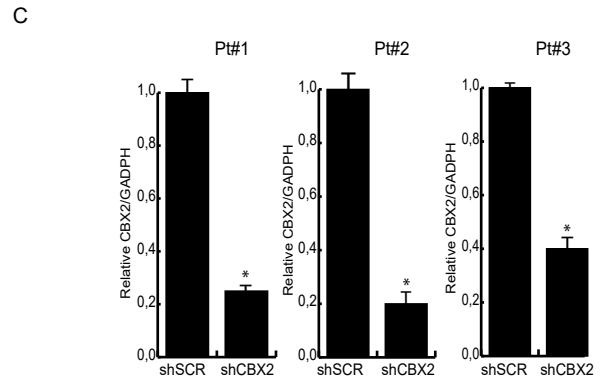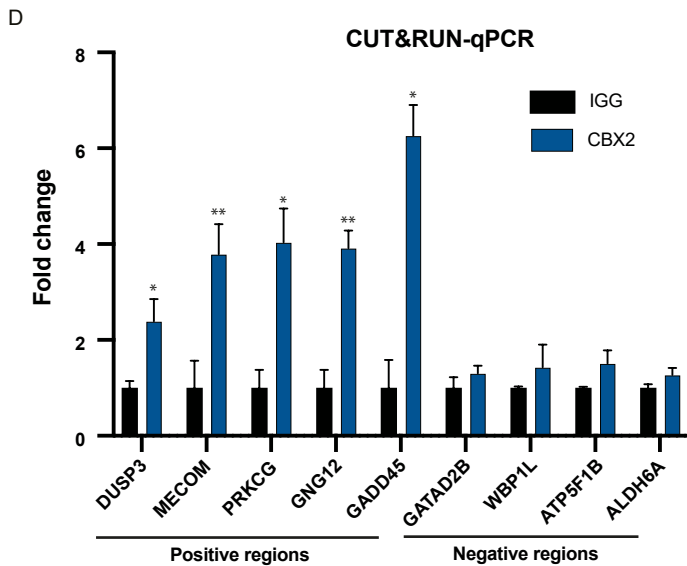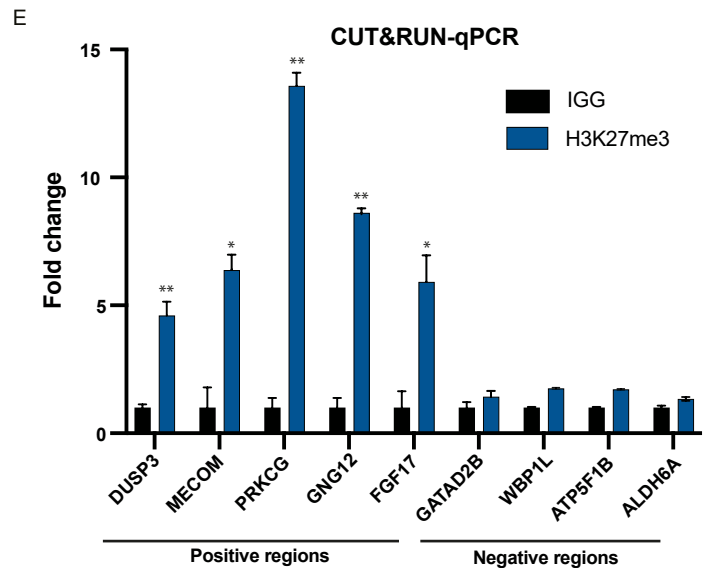

### Supplementary figure 3

A

B

ATAC-seq U937 shCBX2 \_unique region

ATAC-seq U937 shCBX2 \_unique region

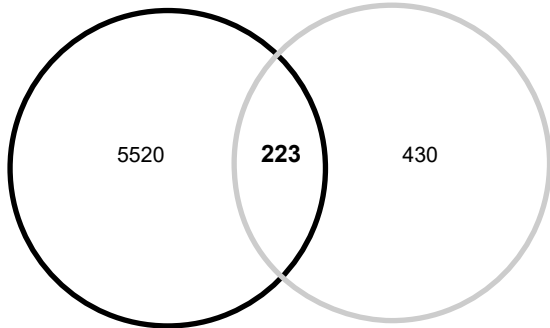

RNAseq U937 shCBX2 UP\_REG DR genes

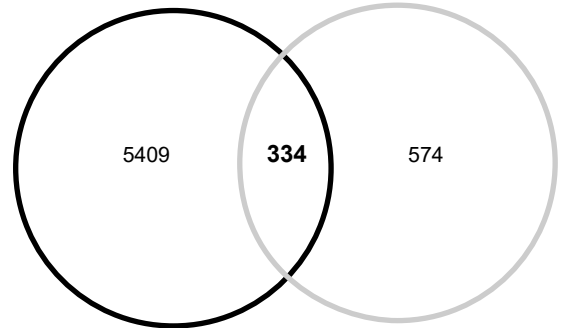

RNAseq U937 shCBX2 DOWN\_REG DR genes

C

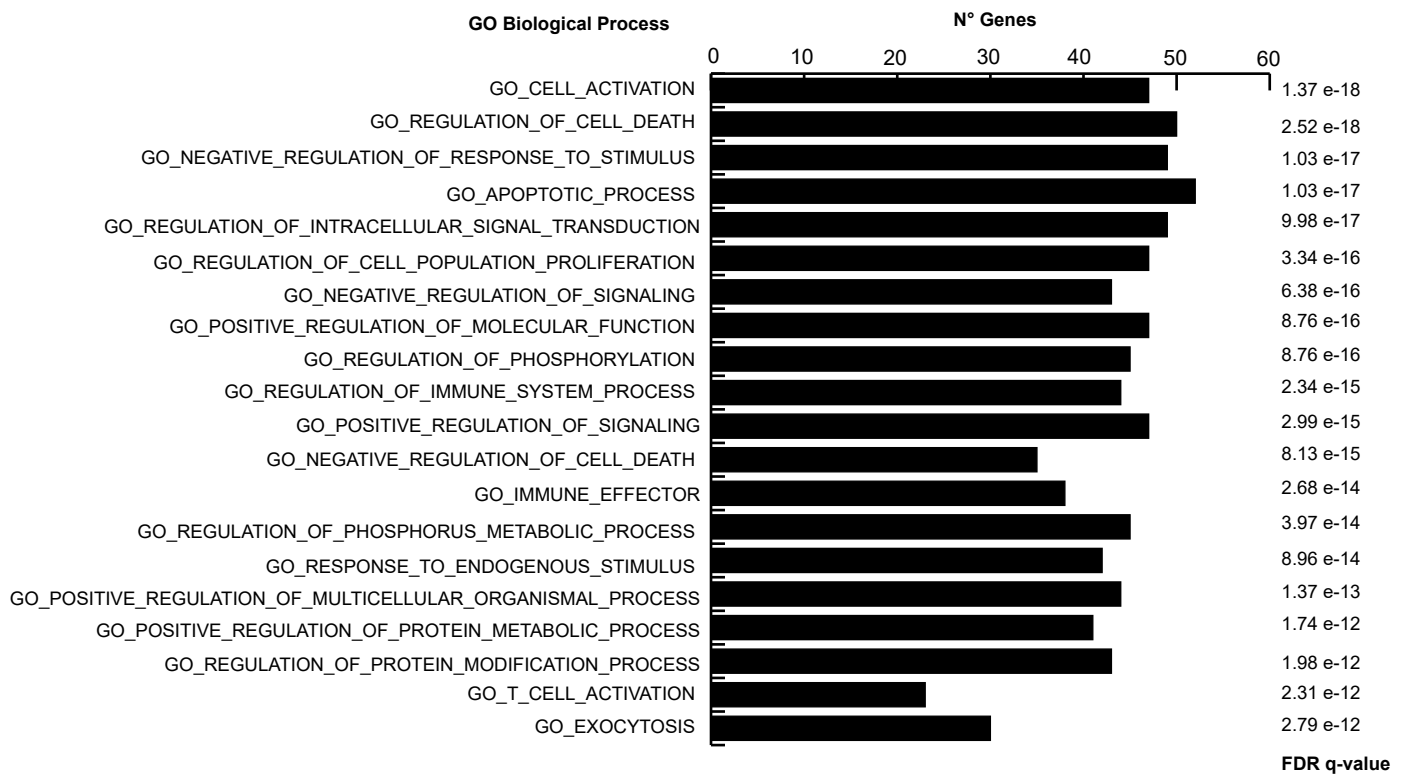

Supplementary figure 4

A

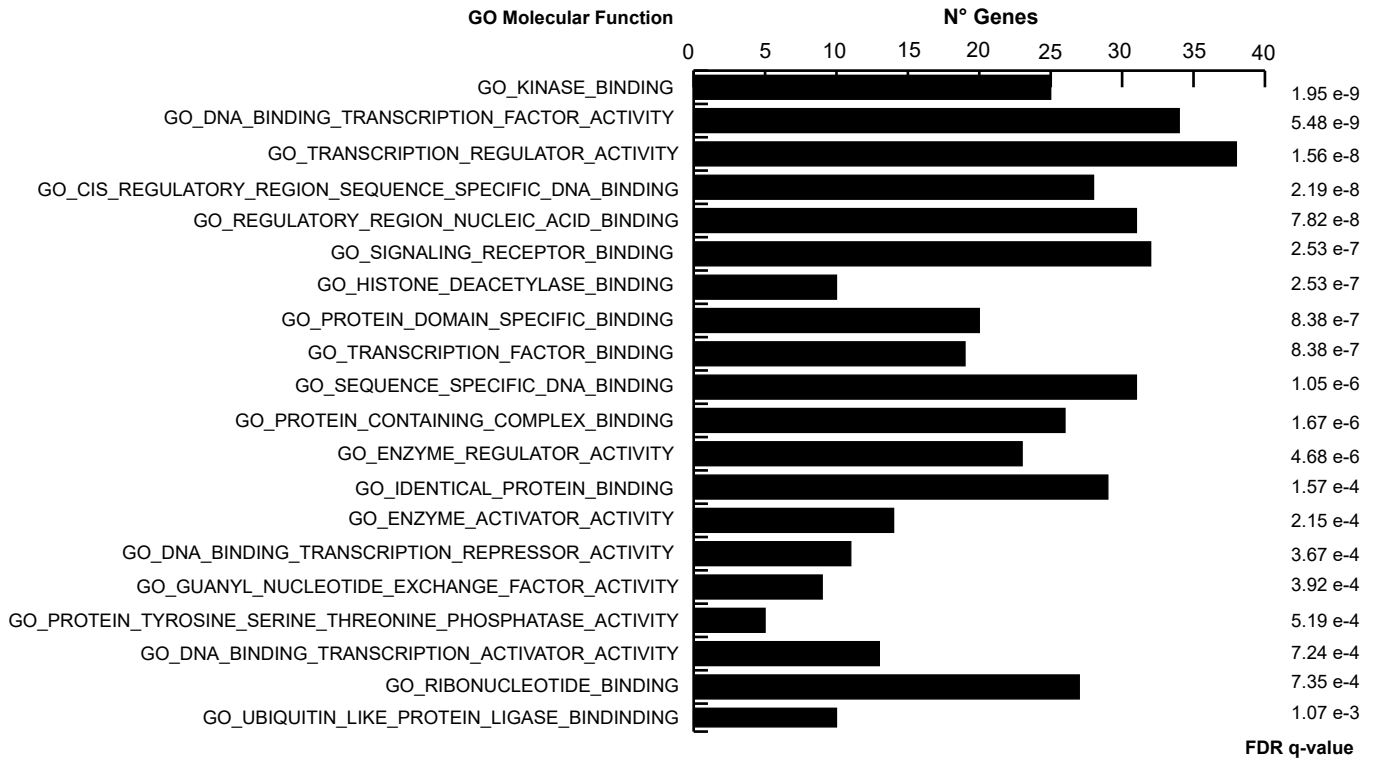

B

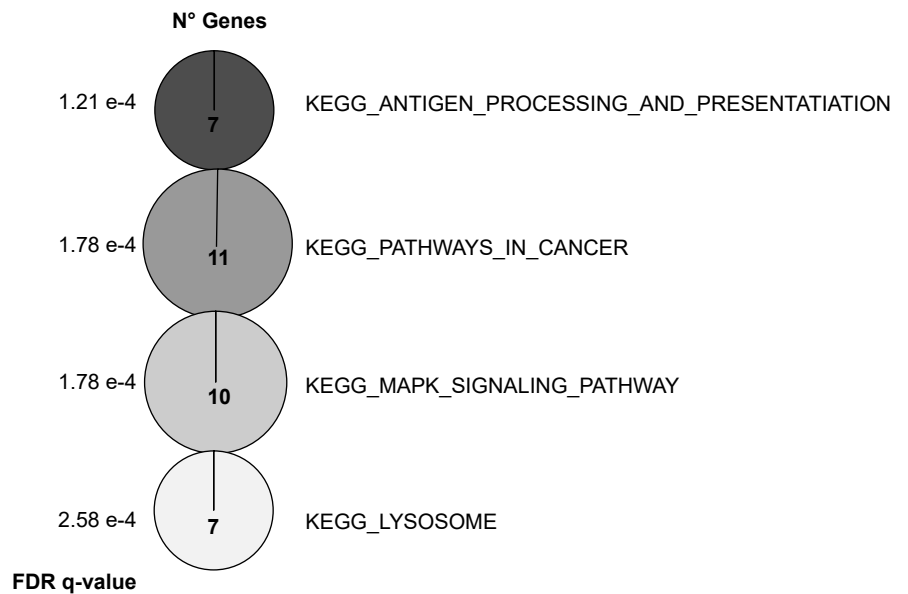

Supplement: 12943_2022_1603_MOESM1_ESM.pdf [file 12943_2022_1603_MOESM1_ESM.pdf]
